# Supplementary material for: PALLD mutation in a European family conveys a stromal predisposition for familial pancreatic cancer
Source: JCI journal article supplement (doi:10.1172/jci.insight.141532), 2021-03-25
Supplement: sd2 [file 2]

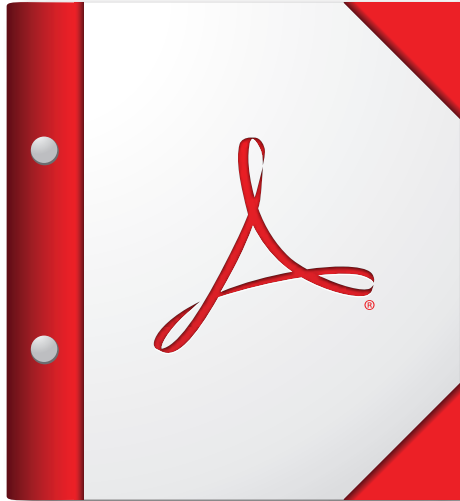

**For the best experience, open this PDF portfolio in  
Acrobat X or Adobe Reader X, or later.**

[Get Adobe Reader Now!](#)
